# Supplementary material
Source: PubMed Central journal article supplement (PMC6640744)
Supplement: ao6b00266_si_001.pdf [file ao6b00266_si_001.pdf]

Supporting Information for

# Synthesis of titanium silicalite-1 with high catalytic performance for 1-butene epoxidation by eliminating the extraframework Ti

*Ting Zhang<sup>1,‡</sup>, Yi Zuo<sup>1,‡</sup>, Min Liu<sup>1,\*</sup>, Chunshan Song<sup>2</sup>, and Xinwen Guo<sup>1,\*</sup>*

<sup>1</sup> State Key Laboratory of Fine Chemicals, PSU-DUT Joint Center for Energy Research, School of Chemical Engineering, Dalian University of Technology, 2 Linggong Road, Dalian 116024, P. R. China

<sup>2</sup> EMS Energy Institute, PSU-DUT Joint Center for Energy Research and Department of Energy & Mineral Engineering, Pennsylvania State University, University Park, PA 16802, USA.

KEYWORDS: TS-1, titanium, starch, coordination state, epoxidation of 1-butene.

### Properties and structure of soluble starch

The soluble starch was bought from Aladdin reagent. It can be dissolved in hot water. The pH of starch solution (5 wt%, 25 °C) is 6.0. The structural formula of starch is shown in Fig. S1.

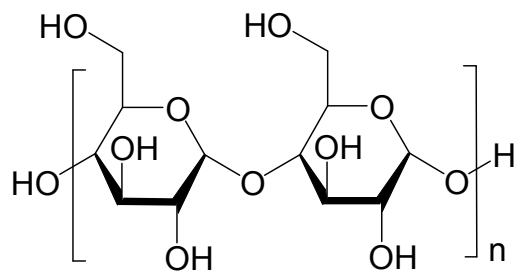

**Figure S1.** Structure of soluble starch used in this paper.
